# Supplementary material for: Computational evaluation of the oxidation of superoxide to molecular dioxygen mediated by NNNN-tetradentate copper complexes
Source: Royal Society of Chemistry journal article supplement (doi:10.1039/d4ra07126c), 2024-01-01
Supplement: d4ra07126c1.pdf [file d4ra07126c1.pdf]

## Supporting Information Material for

### Computational Evaluation of the Oxidation of Superoxide to Molecular Dioxygen Mediated by NNNN-Tetradentate Copper Complexes

**Table S1.** Complexes and corresponding IUPAC names.

| <b>Complex</b> | <b>IUPAC name</b>                                                                     |
|----------------|---------------------------------------------------------------------------------------|
| <b>1</b>       | (1E,1'E)-N,N'-(ethane-1,2-diyl)bis(1-(pyridin-2-yl)methanimine)copper(II)             |
| <b>2</b>       | (1E,1'E)-N,N'-(propane-1,3-diyl)bis(1-(pyridin-2-yl)methanimine)copper(II)            |
| <b>3</b>       | (1E,1'E)-N,N'-(1,2-phenylene)bis(1-(pyridin-2-yl)methanimine)copper(II)               |
| <b>4</b>       | (1E,1'E)-N,N'-(4,5-dimethyl-1,2-phenylene)bis(1-(pyridin-2-yl)methanimine)copper(II)  |
| <b>5</b>       | (1E,1'E)-N,N'-(3,5-dimethyl-1,2-phenylene)bis(1-(pyridin-2-yl)methanimine)copper(II)  |
| <b>6</b>       | (1E,1'E)-N,N'-(4,5-dichloro-1,2-phenylene)bis(1-(pyridin-2-yl)methanimine)copper(II)  |
| <b>7</b>       | (1E,1'E)-N,N'-(naphthalene-1,8-diyl)bis(1-(pyridin-2-yl)methanimine)copper(II)        |
| <b>8</b>       | (1E,1'E)-N,N'-(1,2-diphenylethane-1,2-diyl)bis(1-(pyridin-2-yl)methanimine)copper(II) |
| <b>9</b>       | (1E,1'E)-N,N'-(4-benzyl-1,2-phenylene)bis(1-(pyridin-2-yl)methanimine)copper(II)      |

The Gibbs reaction energies were determined using the thermodynamic data obtained from optimization and frequency calculations. This enables the calculation of the Gibbs energies for both the products and reactants of the reaction under study. The difference between these two energies yields the reaction energy. The following equation summarizes this procedure:

$$\Delta_r G^\circ = \sum (EE_0 + C_{Gibbs})_{products} - \sum (EE_0 + C_{Gibbs})_{reactants}$$

Where  $\Delta_r G^\circ$  represents the Gibbs reaction energy change on standard conditions,  $EE_0$  is the electronic energy, and  $C_{Gibbs}$  is a correction term to the Gibbs energy due to temperature. The thermodynamic values used in the calculations are shown in table S2, where the  $C_H$  is a correction term to the enthalpy energy due to temperature.

**Table S2.** Thermodynamic values of the molecules involved in the considered reactions given in hartrees.  $E_0$  is the electronic energy,  $C_{Gibbs}$  and  $C_H$  are the thermal correction to free energy and enthalpy at 298.15 K, respectively.

| <b>Molecules</b>                        | $E_0$        | $C_{Gibbs}$ | $C_H$    |
|-----------------------------------------|--------------|-------------|----------|
| <b>O<sub>2</sub></b>                    | -150.308589  | -0.015912   | 0.007332 |
| <b>H<sub>2</sub>O</b>                   | -76.420906   | 0.003990    | 0.025404 |
| <b>H<sub>2</sub>O<sub>2</sub></b>       | -151.533993  | 0.005045    | 0.030314 |
| <b>O<sub>2</sub><sup>-</sup></b>        | -150.322373  | -0.016844   | 0.006230 |
| <b>Complex-1-Cu(II)</b>                 | -2401.004539 | 0.220809    | 0.281963 |
| <b>Complex-1-Cu(I)</b>                  | -2401.149408 | 0.217053    | 0.280797 |
| <b>Complex-1-Cu(II)-<br/>superoxide</b> | -2551.469617 | -0.034591   | 0.011641 |
| <b>Complex-1-Cu(I)-<br/>dioxygen</b>    | -2551.463981 | -0.034925   | 0.012587 |
| <b>Complex-1-Cu(II)(OH<sup>-</sup>)</b> | -2477.143734 | 0.220432    | 0.280322 |
| <b>Complex-1-Cu(I)(H<sub>2</sub>O)</b>  | -2477.587722 | 0.233556    | 0.307676 |
| <b>Complex-1-Cu(I)(H<sup>+</sup>)</b>   | -2401.593503 | 0.232577    | 0.295536 |
| <b>Complex-2-Cu(II)</b>                 | -2440.311348 | 0.250296    | 0.312963 |
| <b>Complex-2-Cu(I)</b>                  | -2440.452901 | 0.241776    | 0.310711 |
| <b>Complex-2-Cu(II)-<br/>superoxide</b> | -2590.776515 | -0.034657   | 0.011669 |
| <b>Complex-2-Cu(I)-<br/>dioxygen</b>    | -2590.766547 | -0.036233   | 0.012558 |
| <b>Complex-2-Cu(II)(OH<sup>-</sup>)</b> | -2471.839025 | 0.257954    | 0.327592 |
| <b>Complex-2-Cu(I)(H<sub>2</sub>O)</b>  | -2472.310666 | 0.271377    | 0.341222 |

|                                         |              |           |          |
|-----------------------------------------|--------------|-----------|----------|
| <b>Complex-2-Cu(I)(H<sup>+</sup>)</b>   | -2440.903328 | 0.259517  | 0.325563 |
| <b>Complex-3-Cu(II)</b>                 | -2553.415703 | 0.243222  | 0.308536 |
| <b>Complex-3-Cu(I)</b>                  | -2553.560790 | 0.237590  | 0.306004 |
| <b>Complex-3-Cu(II)-<br/>superoxide</b> | -2703.857379 | -0.033201 | 0.011895 |
| <b>Complex-3-Cu(I)-<br/>dioxygen</b>    | -2703.875439 | 0.236117  | 0.313900 |
| <b>Complex-3-Cu(II)(OH<sup>-</sup>)</b> | -2629.034243 | 0.251784  | 0.323311 |
| <b>Complex-3-Cu(I)(H<sub>2</sub>O)</b>  | -2630.002908 | 0.257456  | 0.333686 |
| <b>Complex-3-Cu(I)(H<sup>+</sup>)</b>   | -2553.994912 | 0.253644  | 0.321037 |
| <b>Complex-4-Cu(II)</b>                 | -2632.031704 | 0.295305  | 0.367146 |
| <b>Complex-4-Cu(I)</b>                  | -2632.175395 | 0.288801  | 0.364575 |
| <b>Complex-4-Cu(II)-<br/>superoxide</b> | -2782.497630 | -0.035027 | 0.011673 |
| <b>Complex-4-Cu(I)-<br/>dioxygen</b>    | -2782.489934 | -0.037379 | 0.012564 |
| <b>Complex-4-Cu(II)(OH<sup>-</sup>)</b> | -2708.152507 | 0.303918  | 0.382215 |
| <b>Complex-4-Cu(I)(H<sub>2</sub>O)</b>  | -2708.617184 | 0.308799  | 0.392061 |
| <b>Complex-4-Cu(I)(H<sup>+</sup>)</b>   | -2632.610851 | 0.305571  | 0.379758 |
| <b>Complex-5-Cu(II)</b>                 | -2632.026911 | 0.295013  | 0.367196 |
| <b>Complex-5-Cu(I)</b>                  | -2632.172088 | 0.289055  | 0.365025 |
| <b>Complex-5-Cu(II)-<br/>superoxide</b> | -2782.492720 | -0.035916 | 0.011641 |
| <b>Complex-5-Cu(I)-<br/>dioxygen</b>    | -2782.486574 | -0.035998 | 0.011591 |
| <b>Complex-5-Cu(II)(OH<sup>-</sup>)</b> | -2708.188273 | 0.303954  | 0.382174 |
| <b>Complex-5-Cu(I)(H<sub>2</sub>O)</b>  | -2708.614012 | 0.308523  | 0.392217 |
| <b>Complex-5-Cu(I)(H<sup>+</sup>)</b>   | -2632.606911 | 0.304974  | 0.379781 |
| <b>Complex-6-Cu(II)</b>                 | -3472.607672 | 0.219869  | 0.291739 |
| <b>Complex-6-Cu(I)</b>                  | -3472.755761 | 0.213893  | 0.289163 |
| <b>Complex-6-Cu(II)-<br/>superoxide</b> | -3623.051466 | -0.038512 | 0.012559 |
| <b>Complex-6-Cu(I)-<br/>dioxygen</b>    | -3623.070309 | -0.037466 | 0.012567 |
| <b>Complex-6-Cu(II)(OH<sup>-</sup>)</b> | -3548.73387  | 0.233027  | 0.314254 |

|                                         |              |           |          |
|-----------------------------------------|--------------|-----------|----------|
| <b>Complex-6-Cu(I)(H<sub>2</sub>O)</b>  | -3549.197586 | 0.233495  | 0.316723 |
| <b>Complex-6-Cu(I)(H<sup>+</sup>)</b>   | -3473.186255 | 0.230125  | 0.304122 |
| <b>Complex-7-Cu(II)</b>                 | -2707.030448 | 0.288865  | 0.358533 |
| <b>Complex-7-Cu(I)</b>                  | -2707.175073 | 0.282068  | 0.356475 |
| <b>Complex-7-Cu(II)-<br/>superoxide</b> | -2857.494712 | -0.036243 | 0.011657 |
| <b>Complex-7-Cu(I)-<br/>dioxygen</b>    | -2857.489731 | -0.036904 | 0.012575 |
| <b>Complex-7-Cu(II)(OH<sup>-</sup>)</b> | -2783.153883 | 0.301652  | 0.379312 |
| <b>Complex-7-Cu(I)(H<sub>2</sub>O)</b>  | -2783.614806 | 0.302571  | 0.383721 |
| <b>Complex-7-Cu(I)(H<sup>+</sup>)</b>   | -2707.602564 | 0.295491  | 0.370163 |
| <b>Complex-8-Cu(II)</b>                 | -2863.035325 | 0.372637  | 0.454142 |
| <b>Complex-8-Cu(I)</b>                  | -2863.180329 | 0.366381  | 0.452062 |
| <b>Complex-8-Cu(II)-<br/>superoxide</b> | -3013.500868 | -0.036663 | 0.011642 |
| <b>Complex-8-Cu(I)-<br/>dioxygen</b>    | -3013.494944 | -0.038029 | 0.012559 |
| <b>Complex-8-Cu(II)(OH<sup>-</sup>)</b> | -2888.191773 | 0.302721  | 0.408612 |
| <b>Complex-8-Cu(I)(H<sub>2</sub>O)</b>  | -2888.700970 | 0.351914  | 0.420254 |
| <b>Complex-8-Cu(I)(H<sup>+</sup>)</b>   | -2863.611753 | 0.380402  | 0.466259 |
| <b>Complex-9-Cu(II)</b>                 | -2823.736699 | 0.342557  | 0.423741 |
| <b>Complex-9-Cu(I)</b>                  | -2823.882307 | 0.337517  | 0.421862 |
| <b>Complex-9-Cu(II)-<br/>superoxide</b> | -2974.202979 | -0.035804 | 0.011677 |
| <b>Complex-9-Cu(I)-<br/>dioxygen</b>    | -2974.197266 | -0.036739 | 0.012601 |
| <b>Complex-9-Cu(II)(OH<sup>-</sup>)</b> | -2899.832723 | 0.328235  | 0.414284 |
| <b>Complex-9-Cu(I)(H<sub>2</sub>O)</b>  | -2900.323729 | 0.355506  | 0.449066 |
| <b>Complex-9-Cu(I)(H<sup>+</sup>)</b>   | -2824.316322 | 0.352596  | 0.436663 |

The H<sup>+</sup> free energy employed in mechanisms 1 and 2 was computed as the addition of its experimental Gibbs free energy of formation and the corresponding solvation energy, being equal to  $-0.4337$  Hartree..<sup>1,2</sup>

1. A. Malloum, J. J. Fifen and J. Conradie, *J. Mol. Liq.*, 2021, **322**, 114919.

2. M. D. Tissandier, K. A. Cowen, W. Y. Feng, E. Gundlach, M. H. Cohen, A. D. Earhart, J. V. Coe and T. R. Tuttle, *J. Phys. Chem. A*, 1998, **102**, 7787–7794.

**Table S3.** Changes in the Gibbs energy of reaction for the three considered mechanisms.

| Complexes | $\Delta G$ (kcal/mol) |        |             |        |             |        |
|-----------|-----------------------|--------|-------------|--------|-------------|--------|
|           | Mechanism 1           |        | Mechanism 2 |        | Mechanism 3 |        |
|           | Step 1                | Step 2 | Step 1      | Step 2 | Step 1      | Step 2 |
| <b>1</b>  | -2.0                  | -462.4 | -80.8       | -94.0  | -79.4       | -104.6 |
| <b>2</b>  | -6.1                  | -168.6 | -84.3       | -90.5  | -77.5       | -106.4 |
| <b>3</b>  | -6.9                  | -167.9 | -75.5       | -99.2  | -81.0       | -98.64 |
| <b>4</b>  | -7.1                  | -167.6 | -75.6       | -99.2  | -80.4       | -98.97 |
| <b>5</b>  | -7.3                  | -167.4 | -76.3       | -98.4  | -82.1       | -89.14 |
| <b>6</b>  | -9.3                  | -165.5 | -75.2       | -99.5  | -82.9       | -87.30 |
| <b>7</b>  | -7.2                  | -167.5 | -73.4       | -101.3 | -81.5       | -88.96 |
| <b>8</b>  | -7.2                  | -167.5 | -75.4       | -99.3  | -81.2       | -89.06 |
| <b>9</b>  | -9.6                  | -165.2 | -76.0       | -98.7  | -80.8       | -278.5 |

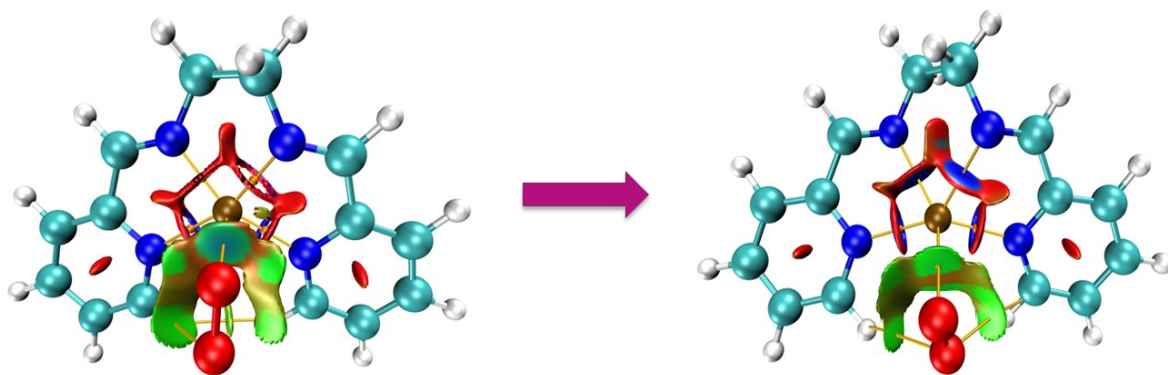

**Figure S1.** Left, NCI graph of the Complex **1** (ox) with the superoxide radical. Right, NCI graph of the Complex **1** (red) with the oxygen.

**Table S4.** Atomic charges and spin densities for the copper cation and oxygens involved in the dismutation reaction for complexes **1**.

| <b>Complex 1 - superoxide</b> |                      |                     |
|-------------------------------|----------------------|---------------------|
| <b>Atom</b>                   | <b>Atomic charge</b> | <b>Spin density</b> |
| Cu(II)                        | 1.3993               | 0.8257              |
| O                             | - 0.4720             | 0.5178              |
| O                             | - 0.4887             | 0.4685              |
| <b>Complex 1 - dioxygen</b>   |                      |                     |
| <b>Atom</b>                   | <b>Atomic charge</b> | <b>Spin density</b> |
| Cu(I)                         | 0.6128               | 0.0051              |
| O                             | - 0.0072             | 0.9950              |
| O                             | - 0.0118             | 0.9953              |

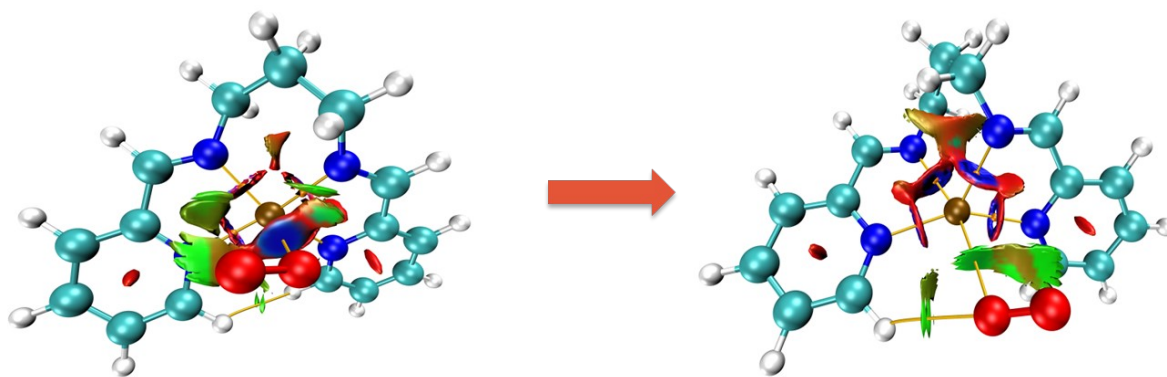

**Figure S2.** Left, NCI graph of the Complex 2 (ox) with the superoxide radical. Right, NCI graph of the Complex 2 (red) with the oxygen.

**Table S5.** Atomic charges and spin densities for the copper cation and oxygens involved in the dismutation reaction for complexes 2.

| Complex 2 - superoxide |                    |              |
|------------------------|--------------------|--------------|
| Atom                   | Electronic charge  | Spin density |
| Cu                     | 1.4258             | 0.8225       |
| O                      | - 0.4597           | 0.4826       |
| O                      | - 0.4707           | 0.5203       |
| Complex 2 - dioxygen   |                    |              |
| Atom                   | Electronic density | Spin density |
| Cu                     | 1.0145             | 0.0097       |
| O                      | - 0.0162           | 0.9924       |
| O                      | - 0.0089           | 0.9937       |

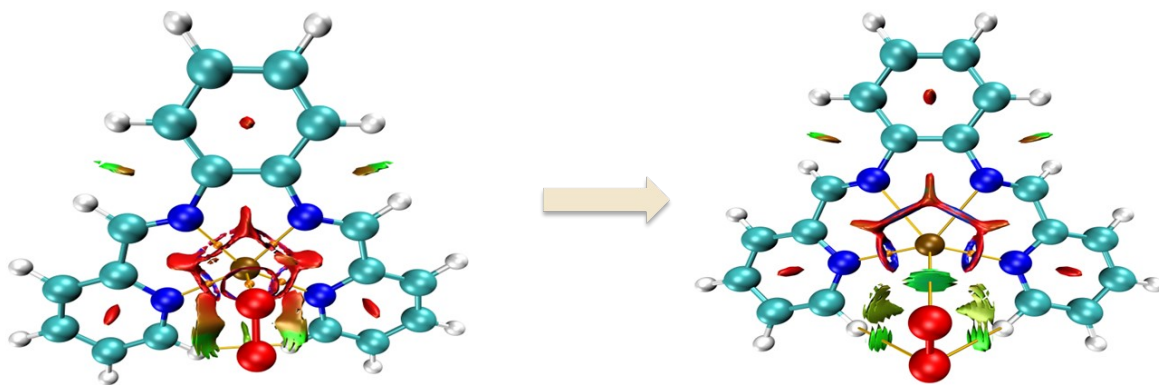

**Figure S3.** Left, NCI graph of the Complex **3** with the superoxide radical. Right, NCI graph of the Complex **3** complex with oxygen.

**Table S6.** Atomic charges and spin densities for the copper cation and oxygens involved in the dismutation reaction for complexes **3**.

| Complex 3 - superoxide |                   |              |
|------------------------|-------------------|--------------|
| Atom                   | Electronic charge | Spin density |
| Cu                     | 1.6599            | 0.8553       |
| O                      | - 0.4330          | 0.5821       |
| O                      | - 0.3730          | 0.5360       |
| Complex 3 - dioxygen   |                   |              |
| Atom                   | Electronic charge | Spin density |
| Cu                     | 0.6128            | 0.0051       |
| O                      | - 0.0072          | 0.9950       |
| O                      | - 0.0118          | 0.9952       |



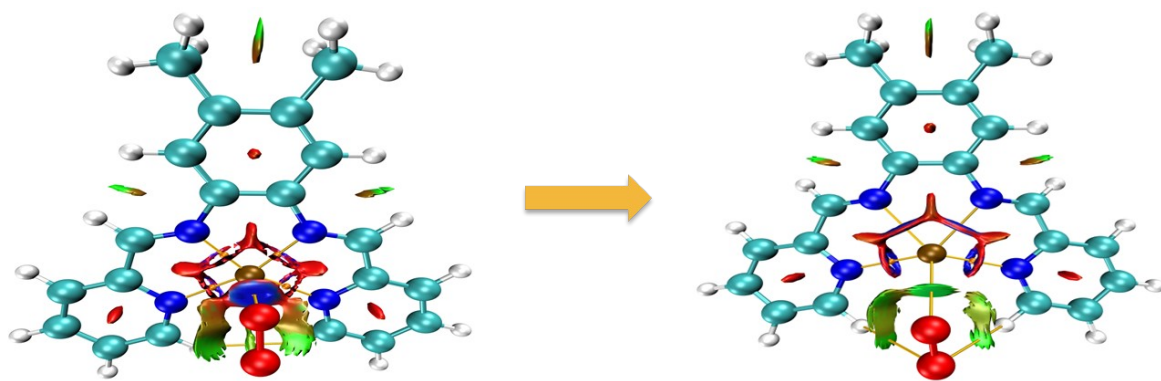

**Figure S4.** Left, NCI graph of the Complex 4 with the superoxide radical. Right, NCI graph of the Complex 4 complex with oxygen.

**Table S7.** Atomic charges and spin densities for the copper cation and oxygens involved in the dismutation reaction for complexes 4.

| <b>Complex 4 - superoxide</b> |                      |                     |
|-------------------------------|----------------------|---------------------|
| <b>Atom</b>                   | <b>Atomic charge</b> | <b>Spin density</b> |
| Cu(II)                        | 1.5226               | 0.8271              |
| O                             | - 0.4708             | 0.5243              |
| O                             | - 0.4586             | 0.4763              |
| <b>Complex 4 - dioxygen</b>   |                      |                     |
| <b>Atom</b>                   | <b>Atomic charge</b> | <b>Spin density</b> |
| Cu(I)                         | 1.1267               | 0.0106              |
| O                             | - 0.0061             | 0.9931              |
| O                             | - 0.0094             | 0.9896              |

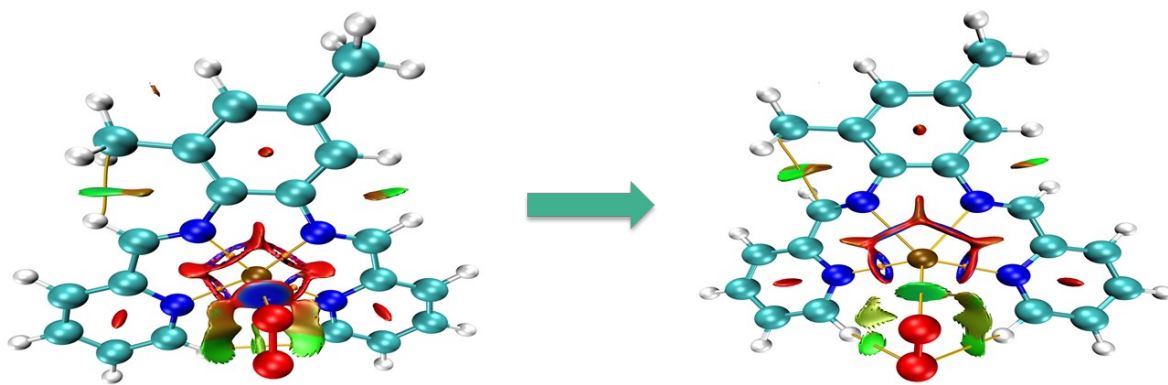

**Figure S5.** Left, NCI graph of the Complex **5** complex with the superoxide radical. Right, NCI graph of the Complex **5** complex with the oxygen.

**Table S8.** Atomic charges and spin densities for the copper cation and oxygens involved in the dismutation reaction for complexes **5**.

| <b>Complex 5 - superoxide</b> |                          |                     |
|-------------------------------|--------------------------|---------------------|
| <b>Atom</b>                   | <b>Electronic charge</b> | <b>Spin density</b> |
| Cu                            | 1.3271                   | 0.8260              |
| O                             | - 0.4708                 | 0.5246              |
| O                             | - 0.4675                 | 0.4765              |
| <b>Complex 5 – dioxygen</b>   |                          |                     |
| <b>Atom</b>                   | <b>Electronic charge</b> | <b>Spin density</b> |
| Cu                            | 0.4749                   | 0.0116              |
| O                             | - 0.0084                 | 0.9933              |
| O                             | - 0.0198                 | 0.9879              |

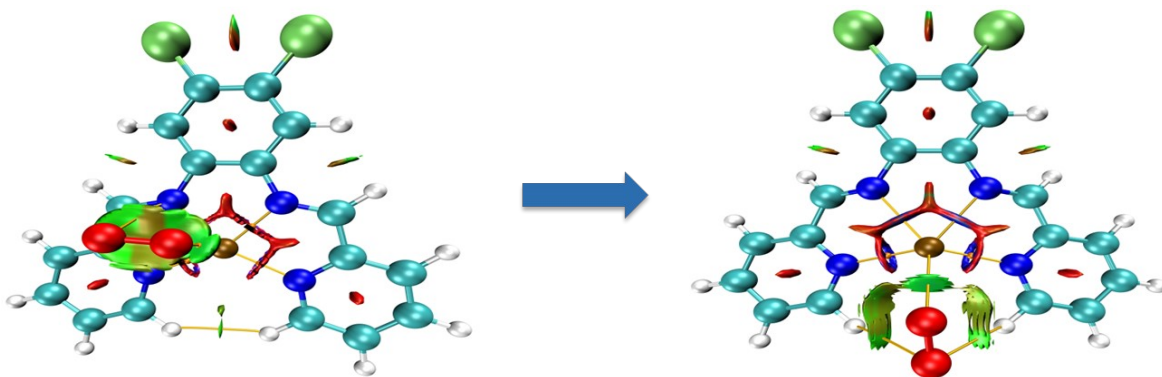

**Figure S6.** Left, NCI graph of the Complex 6 with the superoxide radical. Right, NCI graph of the Complex 6 with oxygen.

**Table S9.** Atomic charges and spin densities for the copper cation and oxygens involved in the dismutation reaction for complexes 6.

| Complex 6 - superoxide |                   |              |
|------------------------|-------------------|--------------|
| Atom                   | Electronic charge | Spin density |
| Cu                     | 1.6680            | 0.8314       |
| O                      | -0.4441           | 0.4708       |
| O                      | -0.4758           | 0.5310       |
| Complex 6 - dioxygen   |                   |              |
| Atom                   | Electronic charge | Spin density |
| Cu                     | 1.1051            | 0.0104       |
| O                      | -0.0103           | 0.9939       |
| O                      | -0.0067           | 0.9895       |

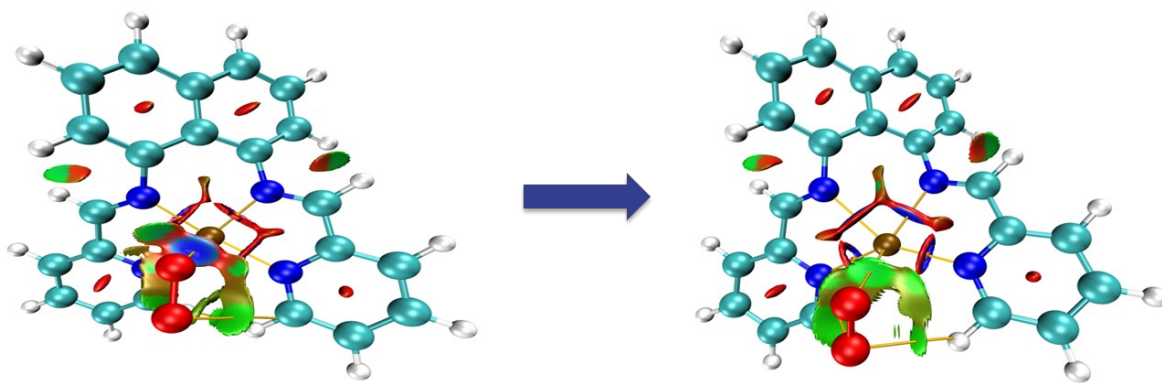

**Figure S7.** Left, NCI graph of the Complex 7 with the superoxide radical. Right, NCI graph of the Complex 7 with oxygen.

**Table S10.** Atomic charges and spin densities for the copper cation and oxygens involved in the dismutation reaction for complexes 7.

| Complex 7 - superoxide |                   |              |
|------------------------|-------------------|--------------|
| Atom                   | Electronic charge | Spin density |
| Cu                     | 1.6132            | 0.8283       |
| O                      | - 0.4703          | 0.5178       |
| O                      | - 0.4657          | 0.4847       |
| Complex 7 - dioxygen   |                   |              |
| Atom                   | Electronic charge | Spin density |
| Cu                     | 1.0985            | 0.0063       |
| O                      | - 0.0065          | 0.9928       |
| O                      | - 0.0108          | 0.9945       |

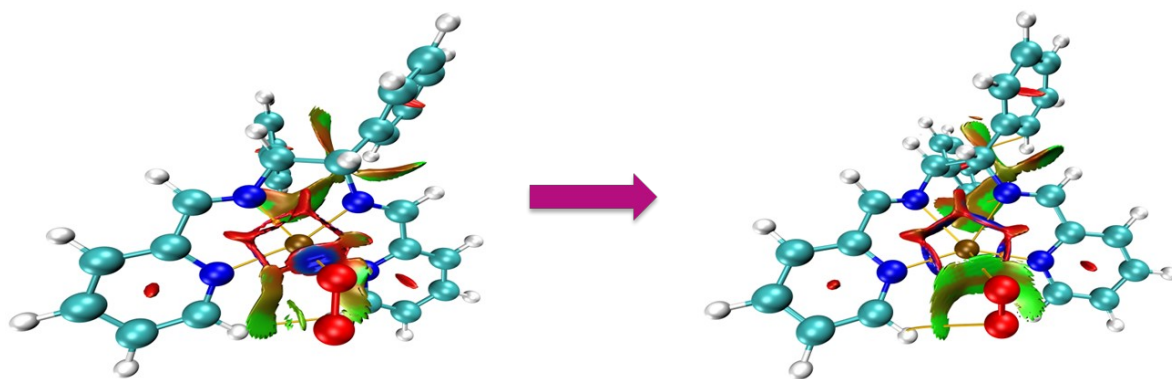

**Figure S8.** Left, NCI graph of the Complex **8** with the superoxide radical. Right, NCI graph of the Complex **8** with oxygen.

**Table S11.** Atomic charges and spin densities for the copper cation and oxygens involved in the dismutation reaction for complexes **8**.

| Complex <b>8</b> - superoxide |                   |              |
|-------------------------------|-------------------|--------------|
| Atom                          | Electronic charge | Spin density |
| Cu                            | 1.6222            | 0.8355       |
| O                             | - 0.4981          | 0.4375       |
| O                             | - 0.4454          | 0.5415       |
| Complex <b>8</b> - dioxygen   |                   |              |
| Atom                          | Electronic charge | Spin density |
| Cu                            | 0.1229            | 0.0042       |
| O                             | - 0.0064          | 0.9952       |
| O                             | - 0.0098          | 0.9959       |

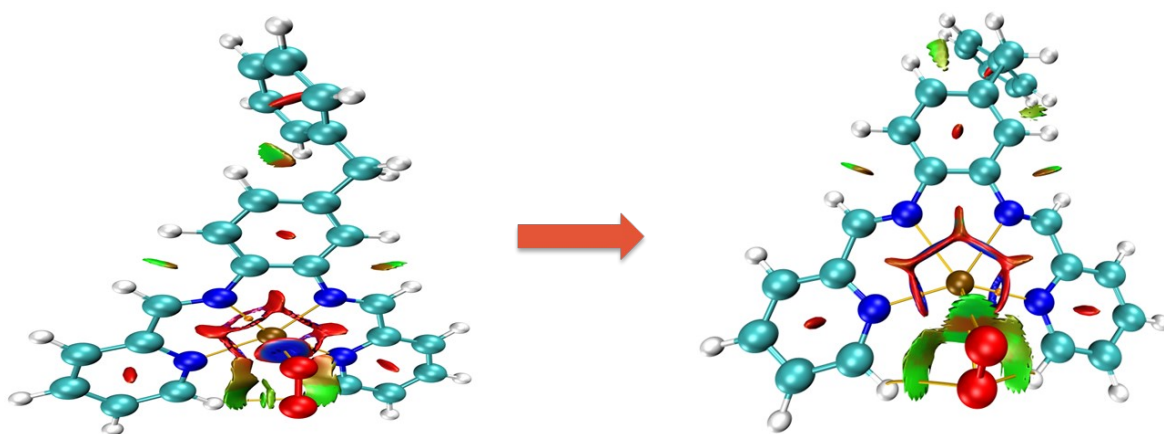

**Figure S9.** Left, NCI graph of the Complex **9** with the superoxide radical. Right, NCI graph of the Cu(I)-11C4 Complex **9** with oxygen.

**Table S12.** Atomic charges and spin densities for the copper cation and oxygens involved in the dismutation reaction for complexes **9**.

| Complex <b>9</b> - superoxide |                   |              |
|-------------------------------|-------------------|--------------|
| Atom                          | Electronic charge | Spin density |
| Cu                            | 1.3946            | 0.8269       |
| O                             | -0.4738           | 0.5261       |
| O                             | -0.4543           | 0.4747       |
| Complex <b>9</b> - dioxygen   |                   |              |
| Atom                          | Electronic charge | Spin density |
| Cu                            | -0.7828           | 0.0065       |
| O                             | -0.0030           | 0.9951       |
| O                             | -0.0088           | 0.9950       |

**Table S13.** Topological parameters calculated for the complex **1** from the electronic density distribution at the BCP.

| BCP                                    | $\rho(r)$ | $\nabla^2 \rho(r)$ | $V(r)$  | $G(r)$ | $ V(r)  / G(r)$ | H       | Elipticity |
|----------------------------------------|-----------|--------------------|---------|--------|-----------------|---------|------------|
| $1(\text{ox}) + \text{O}_2^{\bullet-}$ |           |                    |         |        |                 |         |            |
| 1                                      | 0.0790    | 0.3648             | -0.1148 | 0.1030 | 1.11            | -0.0117 | 0.0172     |
| 2                                      | 0.0790    | 0.3649             | -0.1147 | 0.1030 | 1.11            | -0.0117 | 0.0192     |
| 3                                      | 0.0675    | 0.2936             | -0.0920 | 0.0827 | 1.11            | -0.0093 | 0.0764     |
| 4                                      | 0.0675    | 0.2939             | -0.0921 | 0.0828 | 1.11            | -0.0093 | 0.0761     |
| 5                                      | 0.0201    | 0.0764             | -0.0217 | 0.0204 | 1.06            | -0.0013 | 0.1925     |
| $1(\text{red}) + \text{O}_2$           |           |                    |         |        |                 |         |            |
| 1                                      | 0.0385    | 0.1372             | -0.0484 | 0.0414 | 1.17            | -0.0071 | 0.0469     |
| 2                                      | 0.0385    | 0.1371             | -0.0484 | 0.0413 | 1.17            | -0.0071 | 0.0487     |
| 3                                      | 0.0608    | 0.2722             | -0.0879 | 0.0780 | 1.13            | -0.0099 | 0.0455     |
| 4                                      | 0.0608    | 0.2723             | -0.0880 | 0.0780 | 1.13            | -0.0099 | 0.0443     |
| 5                                      | 0.0102    | 0.0419             | -0.0087 | 0.0096 | 0.91            | 0.0009  | 0.4038     |

**Table S14.** Topological parameters calculated for the complex **2** from the electronic density distribution at the BCP.

| BCP                                    | $\rho(r)$ | $\nabla^2 \rho(r)$ | $V(r)$  | $G(r)$ | $ V(r)  / G(r)$ | H       | Elipticity |
|----------------------------------------|-----------|--------------------|---------|--------|-----------------|---------|------------|
| $2(\text{ox}) + \text{O}_2^{\bullet-}$ |           |                    |         |        |                 |         |            |
| 1                                      | 0.0764    | 0.3542             | -0.1105 | 0.0995 | 1.1106          | -0.0110 | 0.0441     |
| 2                                      | 0.0762    | 0.3533             | -0.1099 | 0.0991 | 1.1090          | -0.0108 | 0.0589     |
| 3                                      | 0.0685    | 0.3068             | -0.0950 | 0.0859 | 1.1059          | -0.0091 | 0.0452     |
| 4                                      | 0.0688    | 0.3081             | -0.0960 | 0.0865 | 1.1098          | -0.0095 | 0.0403     |
| 5                                      | 0.0362    | 0.1385             | -0.0449 | 0.0398 | 1.1281          | -0.0051 | 0.0897     |
| $2(\text{red}) + \text{O}_2$           |           |                    |         |        |                 |         |            |
| 1                                      | 0.0486    | 0.1902             | -0.0654 | 0.0565 | 1.1575          | -0.0089 | 0.0512     |

|   |        |        |         |        |        |         |        |
|---|--------|--------|---------|--------|--------|---------|--------|
| 2 | 0.0485 | 0.1903 | -0.0654 | 0.0565 | 1.1575 | -0.0089 | 0.0521 |
| 3 | 0.0590 | 0.2605 | -0.0848 | 0.0749 | 1.1322 | -0.0099 | 0.0694 |
| 4 | 0.0590 | 0.2612 | -0.0850 | 0.0751 | 1.1318 | -0.0099 | 0.0680 |
| 5 | 0.0111 | 0.0417 | -0.0089 | 0.0097 | 0.9175 | 0.0008  | 0.1294 |

**Table S15.** Topological parameters calculated for the complex **3** from the electronic density distribution at the BCP.

| BCP                                    | $\rho(r)$ | $\nabla^2 \rho(r)$ | $V(r)$  | $G(r)$ | $ V(r)  / G(r)$ | H       | Ellipticity |
|----------------------------------------|-----------|--------------------|---------|--------|-----------------|---------|-------------|
| $3(\text{ox}) + \text{O}_2^{\bullet-}$ |           |                    |         |        |                 |         |             |
| 1                                      | 0.0768    | 0.3649             | -0.1163 | 0.1037 | 1.1215          | -0.0126 | 0.0937      |
| 2                                      | 0.0769    | 0.3660             | -0.1167 | 0.1041 | 1.1210          | -0.0126 | 0.0898      |
| 3                                      | 0.0704    | 0.3240             | -0.1023 | 0.0916 | 1.1168          | -0.0107 | 0.0799      |
| 4                                      | 0.0703    | 0.3236             | -0.1018 | 0.0914 | 1.1138          | -0.0104 | 0.0843      |
| 5                                      | 0.0746    | 0.4047             | -0.1085 | 0.1048 | 1.0353          | -0.0037 | 0.0914      |
| $3(\text{red}) + \text{O}_2$           |           |                    |         |        |                 |         |             |
| 1                                      | 0.0379    | 0.1355             | -0.0477 | 0.0408 | 1.1691          | -0.0069 | 0.0424      |
| 2                                      | 0.0378    | 0.1354             | -0.0476 | 0.0407 | 1.1695          | -0.0069 | 0.0424      |
| 3                                      | 0.0588    | 0.2599             | -0.0843 | 0.0746 | 1.1300          | -0.0097 | 0.0327      |
| 4                                      | 0.0588    | 0.2600             | -0.0844 | 0.0747 | 1.1299          | -0.0097 | 0.0328      |
| 5                                      | 0.0144    | 0.0572             | -0.0138 | 0.0140 | 0.9857          | 0.0002  | 0.0935      |

**Table S16.** Topological parameters calculated for the complex **4** from the electronic density distribution at the BCP.

| BCP                                    | $\rho(r)$ | $\nabla^2 \rho(r)$ | $V(r)$  | $G(r)$ | $ V(r)  / G(r)$ | H       | Ellipticity |
|----------------------------------------|-----------|--------------------|---------|--------|-----------------|---------|-------------|
| $4(\text{ox}) + \text{O}_2^{\bullet-}$ |           |                    |         |        |                 |         |             |
| 1                                      | 0.0756    | 0.3515             | -0.1095 | 0.0987 | 1.1094          | -0.0108 | 0.0059      |
| 2                                      | 0.0755    | 0.3514             | -0.1094 | 0.0986 | 1.1095          | -0.0108 | 0.0072      |



|                         |        |        |         |        |        |         |        |
|-------------------------|--------|--------|---------|--------|--------|---------|--------|
| 3                       | 0.0697 | 0.3091 | -0.0966 | 0.0869 | 1.1116 | -0.0097 | 0.0782 |
| 4                       | 0.0697 | 0.3090 | -0.0967 | 0.0870 | 1.1115 | -0.0097 | 0.0772 |
| 5                       | 0.0384 | 0.1513 | -0.0485 | 0.0432 | 1.1227 | -0.0053 | 0.1028 |
| 4(red) + O <sub>2</sub> |        |        |         |        |        |         |        |
| 1                       | 0.0397 | 0.1443 | -0.0507 | 0.0434 | 1.1682 | -0.0073 | 0.0456 |
| 2                       | 0.0397 | 0.1443 | -0.0507 | 0.0434 | 1.1682 | -0.0073 | 0.0457 |
| 3                       | 0.0575 | 0.2520 | -0.0821 | 0.0725 | 1.1324 | -0.0096 | 0.0311 |
| 4                       | 0.0575 | 0.2519 | -0.0820 | 0.0725 | 1.1310 | -0.0095 | 0.0310 |
| 5                       | 0.0127 | 0.0506 | -0.0115 | 0.0121 | 0.9504 | 0.0006  | 0.1159 |

**Table S17.** Topological parameters calculated for the complex **5** from the electronic density distribution at the BCP.

| BCP                                  | $\rho(r)$ | $\nabla^2 \rho(r)$ | $V(r)$  | $G(r)$ | $ V(r)  / G(r)$ | H       | Elipticity |
|--------------------------------------|-----------|--------------------|---------|--------|-----------------|---------|------------|
| 5(ox) + O <sub>2</sub> <sup>•-</sup> |           |                    |         |        |                 |         |            |
| 1                                    | 0.0725    | 0.3301             | -0.1031 | 0.0928 | 1.1110          | -0.0103 | 0.0092     |
| 2                                    | 0.0786    | 0.3720             | -0.1160 | 0.1044 | 1.1111          | -0.0116 | 0.0062     |
| 3                                    | 0.0725    | 0.3280             | -0.1024 | 0.0922 | 1.1106          | -0.0102 | 0.0730     |
| 4                                    | 0.0682    | 0.2997             | -0.0939 | 0.0844 | 1.1126          | -0.0095 | 0.0666     |
| 5                                    | 0.0382    | 0.1501             | -0.0483 | 0.0429 | 1.1259          | -0.0054 | 0.1034     |
| 5(red) + O <sub>2</sub>              |           |                    |         |        |                 |         |            |
| 1                                    | 0.0416    | 0.1540             | -0.0539 | 0.0462 | 1.1667          | -0.0077 | 0.0512     |
| 2                                    | 0.0357    | 0.1241             | -0.0438 | 0.0374 | 1.1711          | -0.0064 | 0.0396     |
| 3                                    | 0.0575    | 0.2512             | -0.0820 | 0.0724 | 1.1326          | -0.0096 | 0.0366     |
| 4                                    | 0.0605    | 0.2714             | -0.0876 | 0.0777 | 1.1274          | -0.0099 | 0.0302     |
| 5                                    | 0.0141    | 0.0560             | -0.0134 | 0.0137 | 0.9781          | 0.0003  | 0.0968     |

**Table S18.** Topological parameters calculated for the complex **6** from the electronic density distribution at the BCP.

| BCP                       | $\rho(r)$ | $\nabla^2 \rho(r)$ | $V(r)$  | $G(r)$ | $ V(r)  / G(r)$ | H       | Elipticity |
|---------------------------|-----------|--------------------|---------|--------|-----------------|---------|------------|
| $6(ox) + O_2^{\bullet -}$ |           |                    |         |        |                 |         |            |
| 1                         | 0.0746    | 0.3479             | -0.1079 | 0.0974 | 1.1073          | -0.0105 | 0.0084     |
| 2                         | 0.0745    | 0.3483             | -0.1079 | 0.0975 | 1.1065          | -0.0104 | 0.0093     |
| 3                         | 0.0699    | 0.3098             | -0.0970 | 0.0872 | 1.1121          | -0.0098 | 0.0817     |
| 4                         | 0.0700    | 0.3101             | -0.0972 | 0.0873 | 1.1125          | -0.0098 | 0.0840     |
| 5                         | 0.0415    | 0.1710             | -0.0535 | 0.0481 | 1.1114          | -0.0054 | 0.0658     |
| $6(red) + O_2$            |           |                    |         |        |                 |         |            |
| 1                         | 0.0380    | 0.1367             | -0.0480 | 0.0411 | 1.1679          | -0.0069 | 0.0428     |
| 2                         | 0.0380    | 0.1367             | -0.0480 | 0.0411 | 1.1679          | -0.0069 | 0.0428     |
| 3                         | 0.0583    | 0.2573             | -0.0835 | 0.0739 | 1.1299          | -0.0096 | 0.0331     |
| 4                         | 0.0583    | 0.2573             | -0.0835 | 0.0739 | 1.1299          | -0.0096 | 0.0331     |
| 5                         | 0.0126    | 0.0508             | -0.0115 | 0.0121 | 0.9504          | 0.0006  | 0.1130     |

**Table S19.** Topological parameters calculated for the complex **7** from the electronic density distribution at the BCP.

| BCP                       | $\rho(r)$ | $\nabla^2 \rho(r)$ | $V(r)$  | $G(r)$ | $ V(r)  / G(r)$ | H       | Elipticity |
|---------------------------|-----------|--------------------|---------|--------|-----------------|---------|------------|
| $7(ox) + O_2^{\bullet -}$ |           |                    |         |        |                 |         |            |
| 1                         | 0.0731    | 0.3425             | -0.1053 | 0.0954 | 1.1038          | -0.0099 | 0.0565     |
| 2                         | 0.0778    | 0.3727             | -0.1152 | 0.1042 | 1.1056          | -0.0110 | 0.0439     |
| 3                         | 0.0718    | 0.3295             | -0.1021 | 0.0922 | 1.1074          | -0.0099 | 0.0211     |
| 4                         | 0.0685    | 0.3072             | -0.0953 | 0.0861 | 1.1069          | -0.0092 | 0.0490     |
| 5                         | 0.0338    | 0.1259             | -0.0412 | 0.0363 | 1.1350          | -0.0049 | 0.1082     |
| $7(red) + O_2$            |           |                    |         |        |                 |         |            |
| 1                         | 0.0422    | 0.1586             | -0.0552 | 0.0474 | 1.1646          | -0.0078 | 0.0502     |

|   |        |        |         |        |        |         |        |
|---|--------|--------|---------|--------|--------|---------|--------|
| 2 | 0.0402 | 0.1478 | -0.0518 | 0.0444 | 1.1667 | -0.0074 | 0.0551 |
| 3 | 0.0649 | 0.2996 | -0.0963 | 0.0856 | 1.1250 | -0.0107 | 0.0409 |
| 4 | 0.0657 | 0.3045 | -0.0978 | 0.0870 | 1.1241 | -0.0108 | 0.0444 |
| 5 | 0.0103 | 0.0399 | -0.0084 | 0.0092 | 0.9130 | 0.0008  | 0.1250 |

**Table S20.** Topological parameters calculated for the complex **8** from the electronic density distribution at the BCP.

| BCP                                    | $\rho(r)$ | $\nabla^2 \rho(r)$ | $V(r)$  | $G(r)$ | $ V(r)  / G(r)$ | H       | Ellipticity |
|----------------------------------------|-----------|--------------------|---------|--------|-----------------|---------|-------------|
| $8(\text{ox}) + \text{O}_2^{\bullet-}$ |           |                    |         |        |                 |         |             |
| 1                                      | 0.0780    | 0.3616             | -0.1136 | 0.1020 | 1.1137          | -0.0116 | 0.0197      |
| 2                                      | 0.0805    | 0.3763             | -0.1187 | 0.1064 | 1.1156          | -0.0123 | 0.0174      |
| 3                                      | 0.0647    | 0.2769             | -0.0871 | 0.0781 | 1.1152          | -0.0090 | 0.0738      |
| 4                                      | 0.0656    | 0.2832             | -0.0888 | 0.0798 | 1.1128          | -0.0090 | 0.0713      |
| 5                                      | 0.0361    | 0.1542             | -0.0466 | 0.0426 | 1.0939          | -0.0040 | 0.1481      |
| $8(\text{red}) + \text{O}_2$           |           |                    |         |        |                 |         |             |
| 1                                      | 0.0440    | 0.1672             | -0.0583 | 0.0500 | 1.1660          | -0.0083 | 0.0509      |
| 2                                      | 0.0393    | 0.1406             | -0.0498 | 0.0425 | 1.1718          | -0.0073 | 0.0468      |
| 3                                      | 0.0591    | 0.2610             | -0.0849 | 0.0751 | 1.1305          | -0.0098 | 0.0538      |
| 4                                      | 0.0590    | 0.2617             | -0.0848 | 0.0751 | 1.1292          | -0.0097 | 0.0326      |
| 5                                      | 0.0088    | 0.0349             | -0.0069 | 0.0078 | 0.8846          | 0.0009  | 0.4142      |

**Table S21.** Topological parameters calculated for the complex **9** from the electronic density distribution at the BCP.

| BCP                                    | $\rho(r)$ | $\nabla^2 \rho(r)$ | $V(r)$  | $G(r)$ | $ V(r)  / G(r)$ | H       | Ellipticity |
|----------------------------------------|-----------|--------------------|---------|--------|-----------------|---------|-------------|
| $9(\text{ox}) + \text{O}_2^{\bullet-}$ |           |                    |         |        |                 |         |             |
| 1                                      | 0.0767    | 0.3590             | -0.1119 | 0.1008 | 1.1101          | -0.0111 | 0.0060      |
| 2                                      | 0.0758    | 0.3538             | -0.1102 | 0.0993 | 1.1098          | -0.0109 | 0.0073      |

|                         |        |        |         |        |        |         |        |
|-------------------------|--------|--------|---------|--------|--------|---------|--------|
| 3                       | 0.0691 | 0.3058 | -0.0957 | 0.0861 | 1.1115 | -0.0096 | 0.0740 |
| 4                       | 0.0697 | 0.3095 | -0.0967 | 0.0870 | 1.1115 | -0.0097 | 0.0775 |
| 5                       | 0.0394 | 0.1578 | -0.0503 | 0.0449 | 1.1203 | -0.0054 | 0.1006 |
| 9(red) + O <sub>2</sub> |        |        |         |        |        |         |        |
| 1                       | 0.0396 | 0.1447 | -0.0508 | 0.0434 | 1.1705 | -0.0074 | 0.0444 |
| 2                       | 0.0380 | 0.1359 | -0.0479 | 0.0409 | 1.1711 | -0.0070 | 0.0408 |
| 3                       | 0.0582 | 0.2562 | -0.0833 | 0.0737 | 1.1303 | -0.0096 | 0.0302 |
| 4                       | 0.0581 | 0.2564 | -0.0833 | 0.0737 | 1.1303 | -0.0096 | 0.0273 |
| 5                       | 0.0104 | 0.0453 | -0.0096 | 0.0104 | 0.9231 | 0.0008  | 1.8119 |

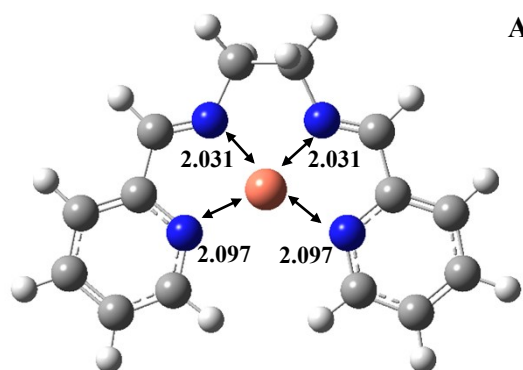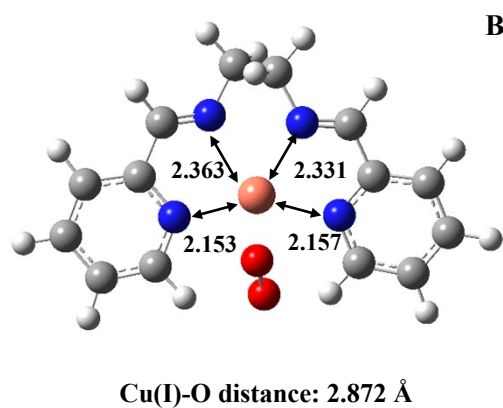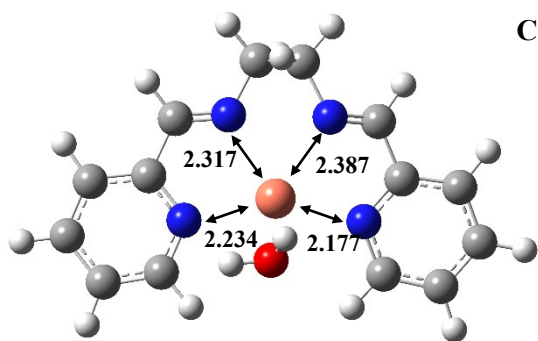

**Cu(I)-O distance: 2.486 Å**

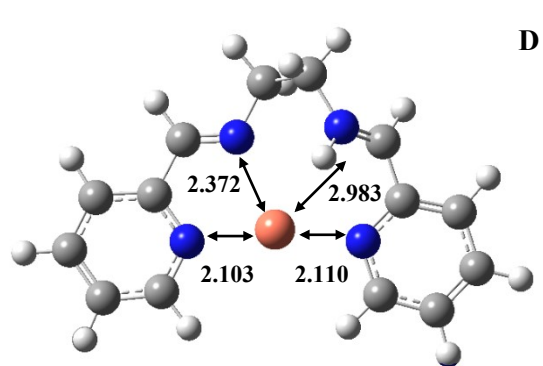

**F**

**figure S11.** Optimized structures and distances between copper and nitrogen for: (A) complex 1-Cu(II); (B) reaction intermediate Cu(I)-O<sub>2</sub>; (C) reaction intermediate Cu(I)-H<sub>2</sub>O; (D) reaction intermediate Cu(I)-H<sup>+</sup>. Distances are given in angstroms.

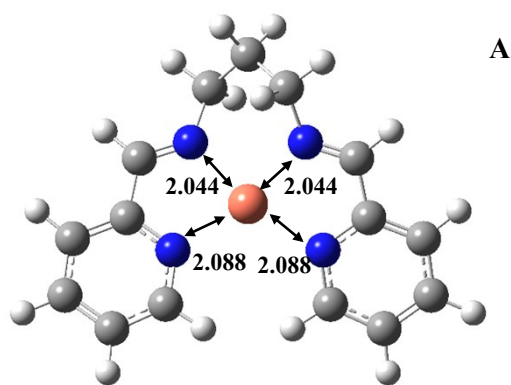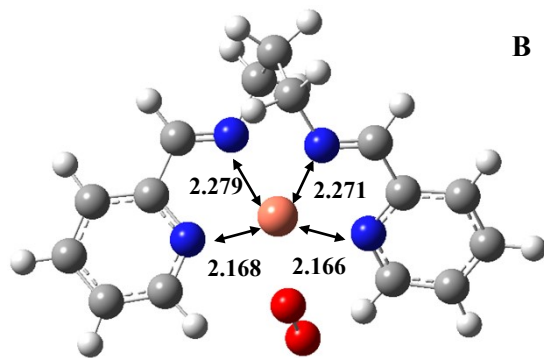

Cu(I)-O distance: 2.880 Å

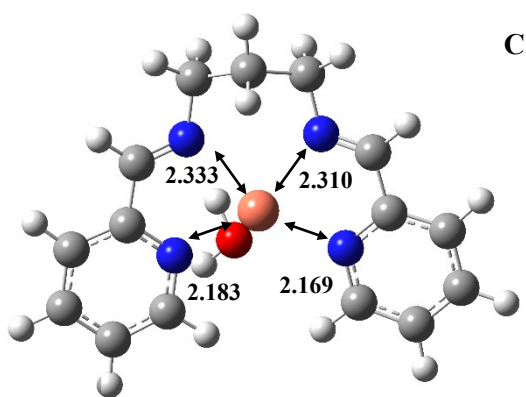

Cu(I)-O distance: 2.743 Å

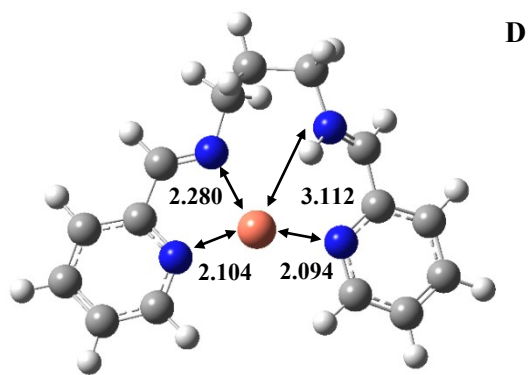

**Figure S12.** Optimized structures and distances between copper and nitrogen for: (A) complex 2-Cu(II); (B) reaction intermediate Cu(I)-O<sub>2</sub>; (C) reaction intermediate Cu(I)-H<sub>2</sub>O; (D) reaction intermediate Cu(I)-H<sup>+</sup>. Distances are given in angstroms.

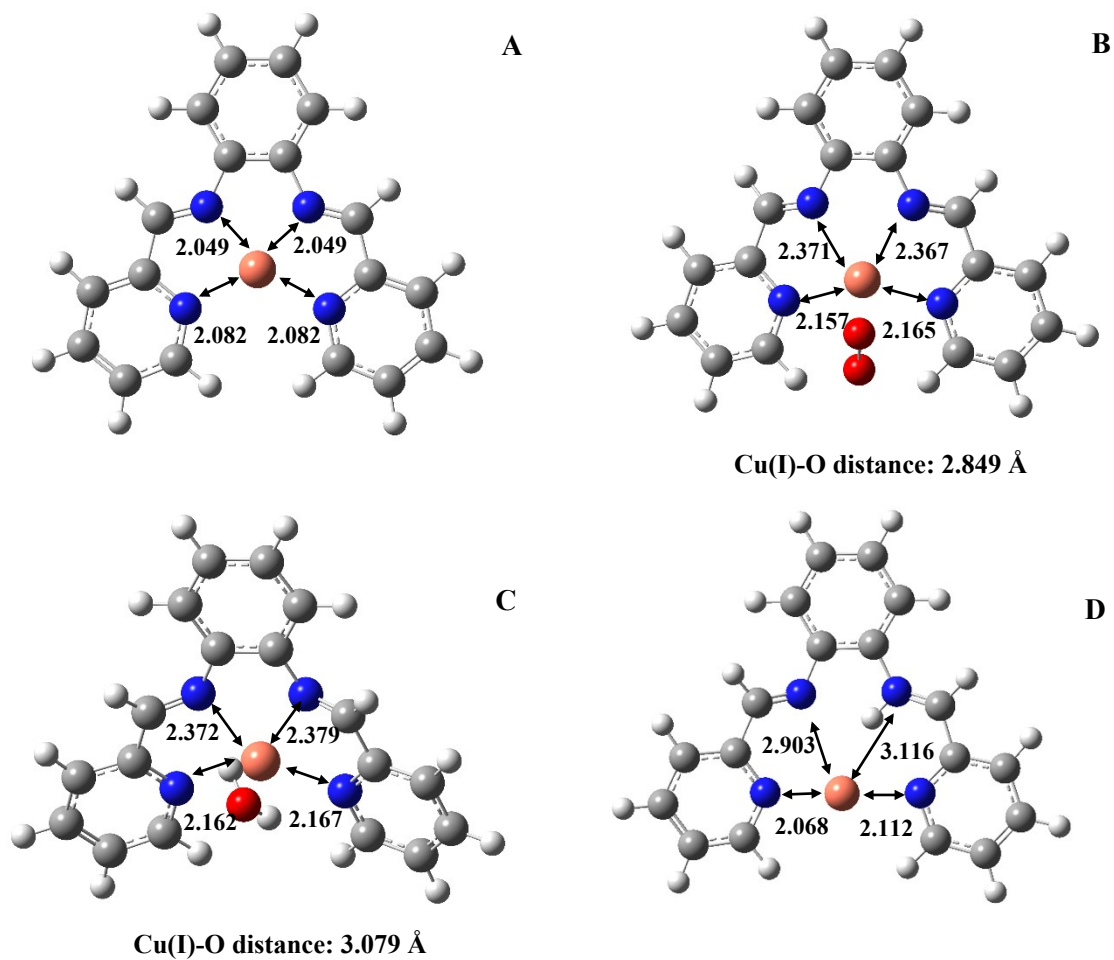

**Figure S13.** Optimized structures and distances between copper and nitrogen for: (A) complex 3-Cu(II); (B) reaction intermediate Cu(I)-O<sub>2</sub>; (C) reaction intermediate Cu(I)-H<sub>2</sub>O; (D) reaction intermediate Cu(I)-H<sup>+</sup>. Distances are given in angstroms.

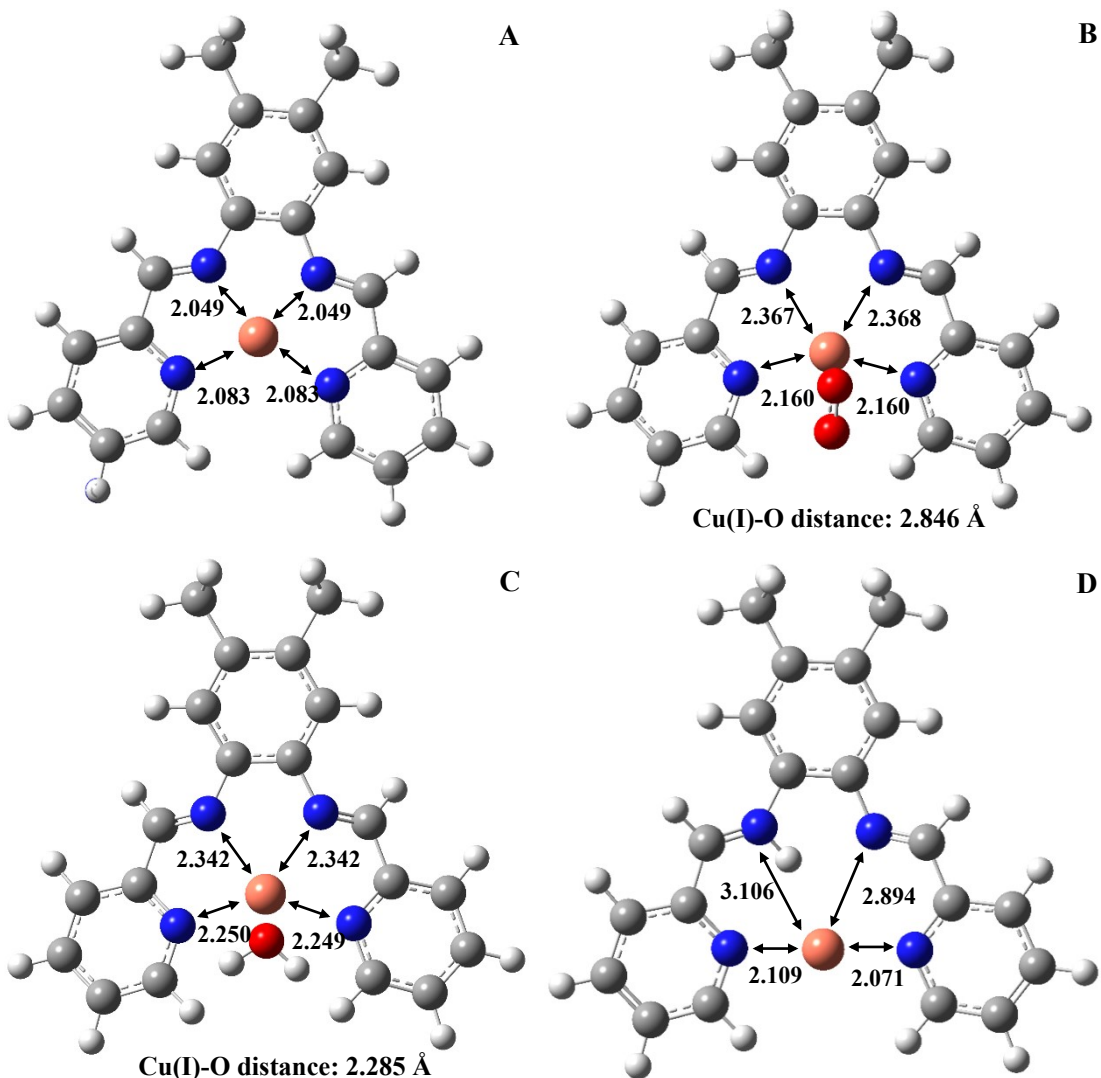

**Figure S14.** Optimized structures and distances between copper and nitrogen for: (A) complex 4-Cu(II); (B) reaction intermediate Cu(I)-O<sub>2</sub>; (C) reaction intermediate Cu(I)-H<sub>2</sub>O; (D) reaction intermediate Cu(I)-H<sup>+</sup>. Distances are given in angstroms.

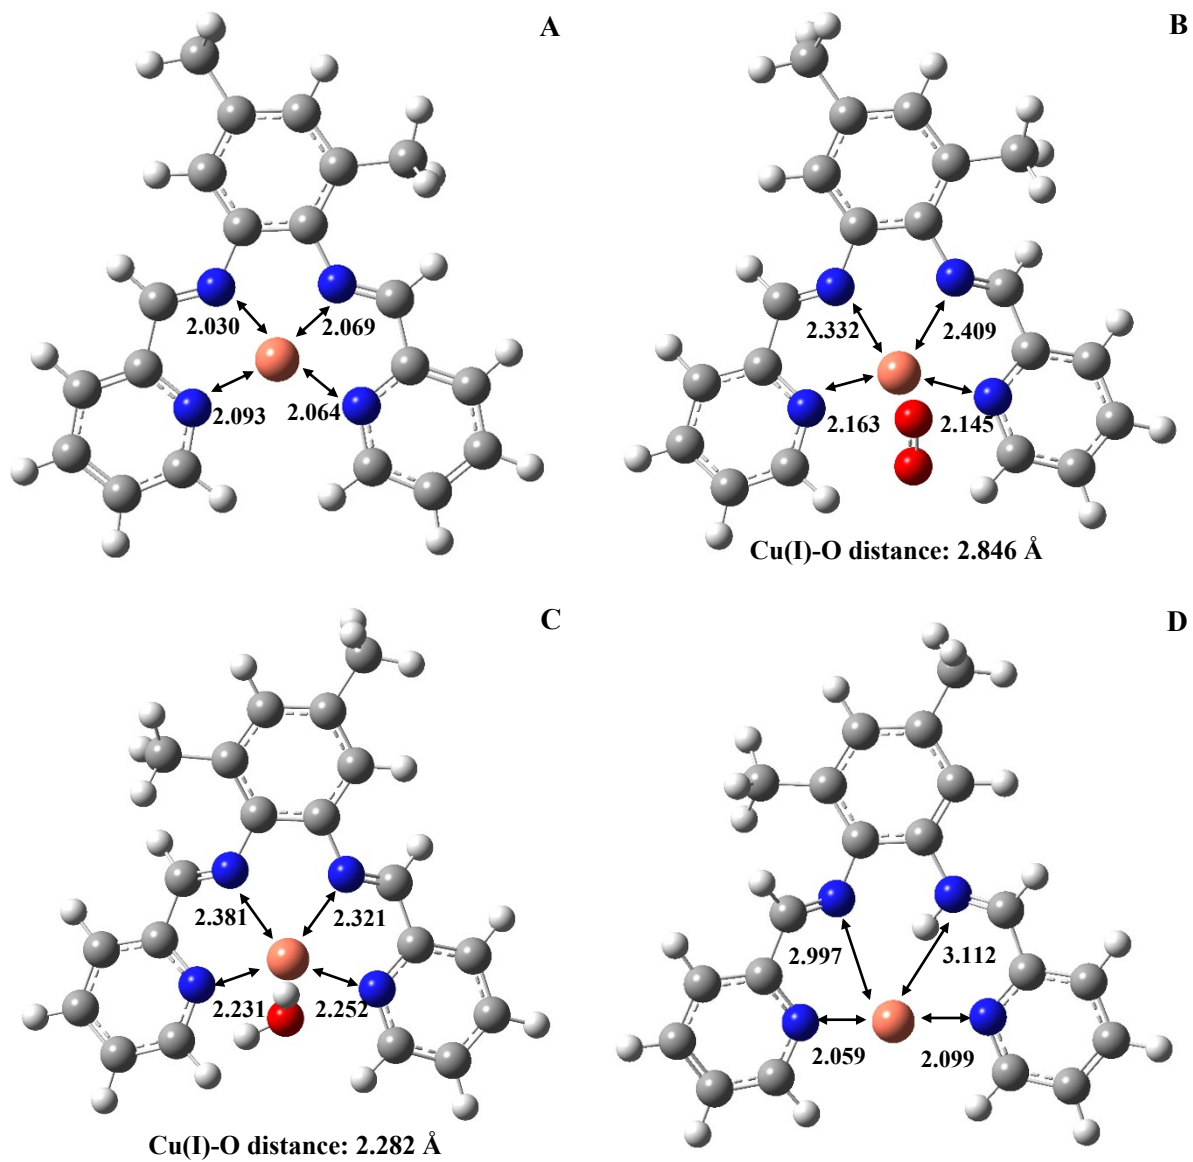

**Figure S15.** Optimized structures and distances between copper and nitrogen for: (A) complex 5-Cu(II); (B) reaction intermediate Cu(I)-O<sub>2</sub>; (C) reaction intermediate Cu(I)-H<sub>2</sub>O; (D) reaction intermediate Cu(I)-H<sup>+</sup>. Distances are given in angstroms.



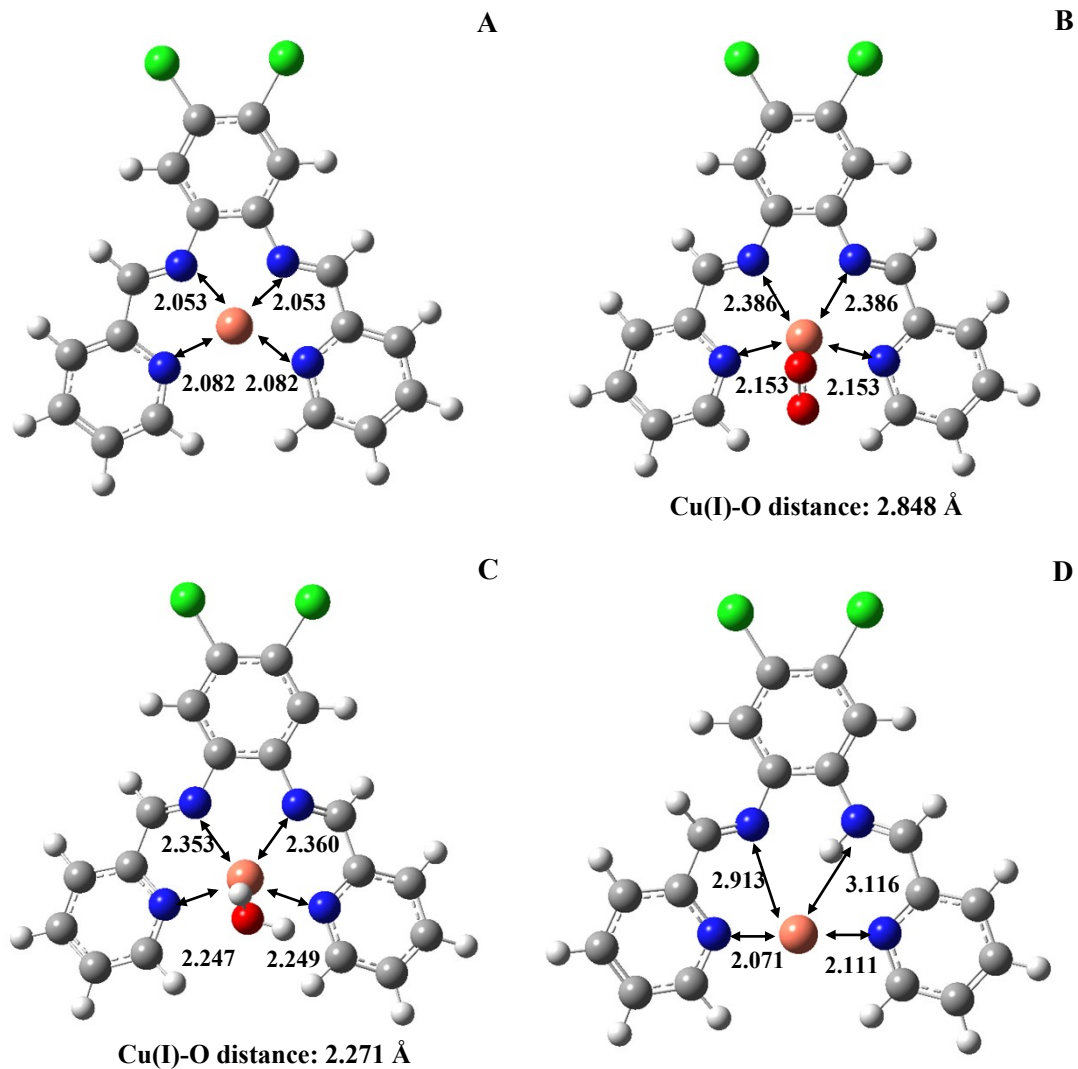

**Figure S16.** Optimized structures and distances between copper and nitrogen for: (A) complex 6-Cu(II); (B) reaction intermediate Cu(I)-O<sub>2</sub>; (C) reaction intermediate Cu(I)-H<sub>2</sub>O; (D) reaction intermediate Cu(I)-H<sup>+</sup>. Distances are given in angstroms.

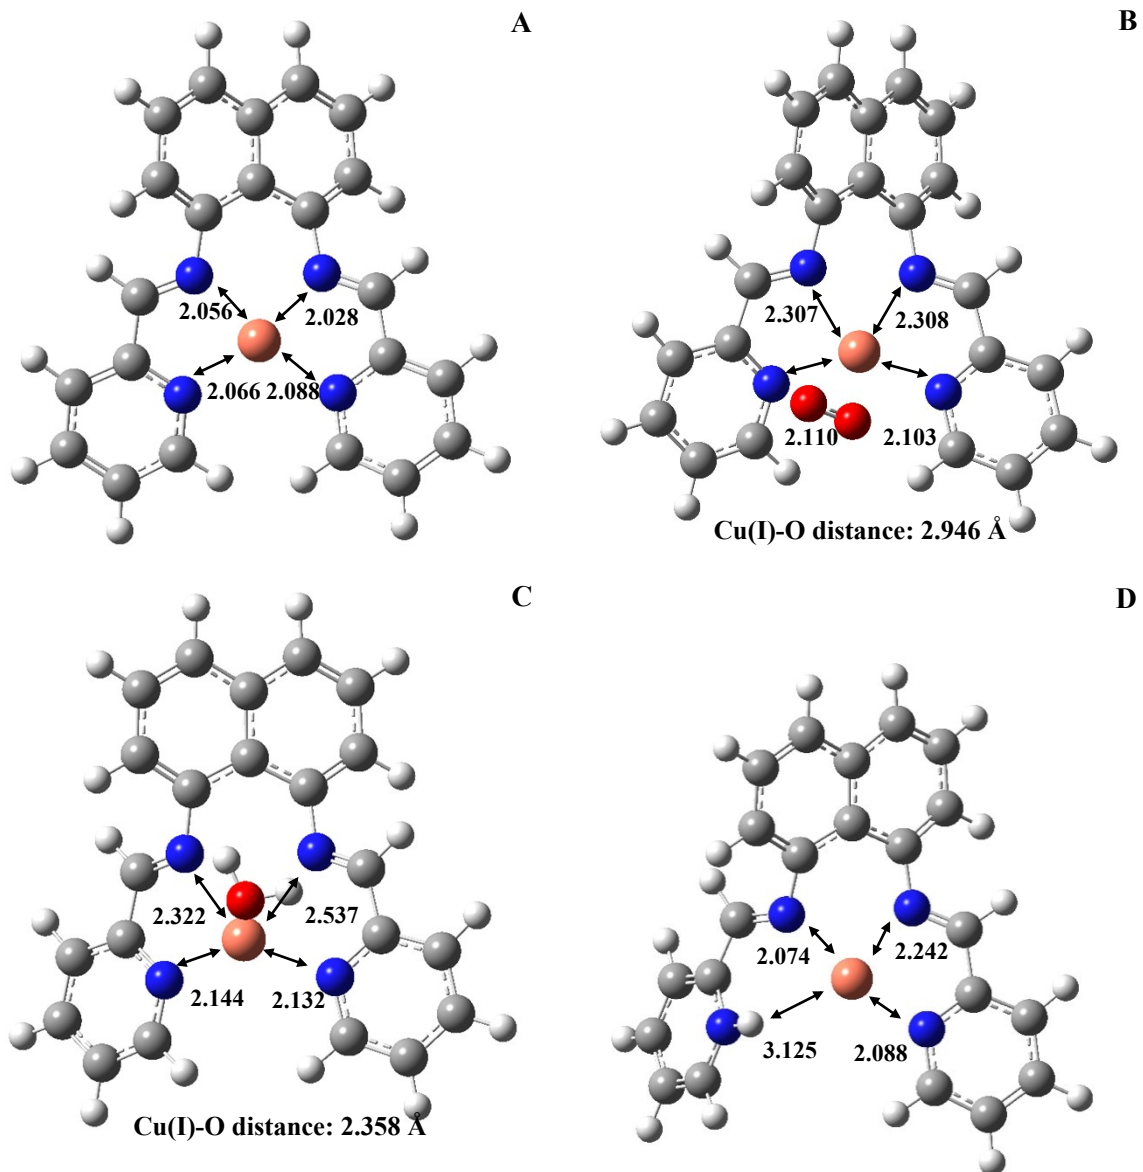

**Figure S17.** Optimized structures and distances between copper and nitrogen for: (A) complex 7-Cu(II); (B) reaction intermediate Cu(I)-O<sub>2</sub>; (C) reaction intermediate Cu(I)-H<sub>2</sub>O; (D) reaction intermediate Cu(I)-H<sup>+</sup>. Distances are given in angstroms.

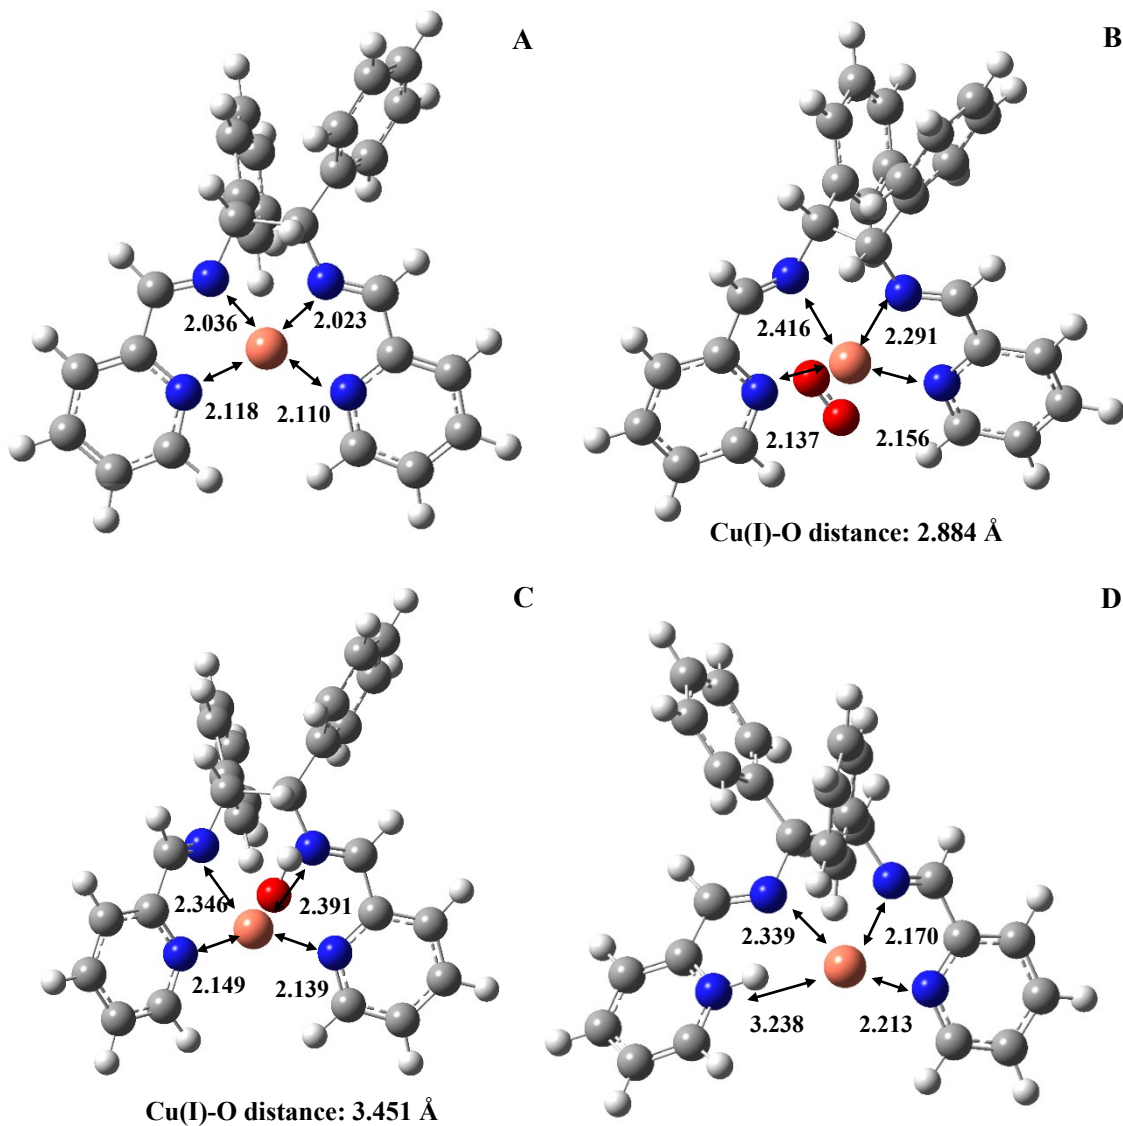

**Figure S18.** Optimized structures and distances between copper and nitrogen for: (A) complex 8-Cu(II); (B) reaction intermediate Cu(I)-O<sub>2</sub>; (C) reaction intermediate Cu(I)-H<sub>2</sub>O; (D) reaction intermediate Cu(I)-H<sup>+</sup>. Distances are given in angstroms.

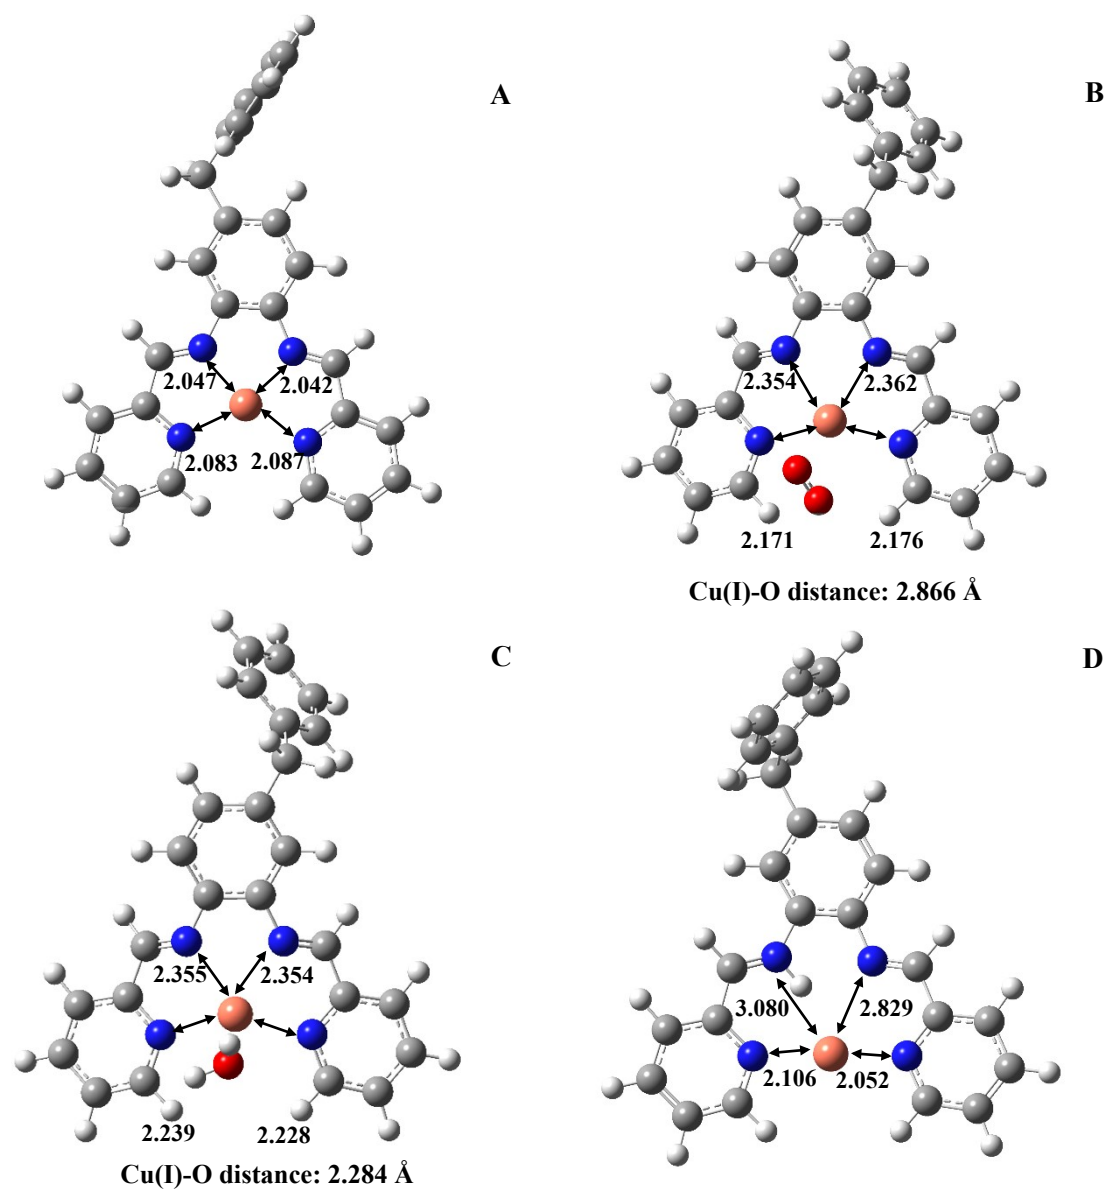

**Figure S19.** Optimized structures and distances between copper and nitrogen for: (A) complex 9-Cu(II); (B) reaction intermediate Cu(I)-O<sub>2</sub>; (C) reaction intermediate Cu(I)-H<sub>2</sub>O; (D) reaction intermediate Cu(I)-H<sup>+</sup>. Distances are given in angstroms.

**Table S22.** Copper and oxygens distances given in angstroms for the nine complexes.

| Complex | Cu(II) – superoxide distance | Cu(I) – dioxygen distance |
|---------|------------------------------|---------------------------|
| 1       | 2.5681                       | 2.8807                    |
| 2       | 2.3495                       | 2.8630                    |
| 3       | 2.0002                       | 2.7010                    |
| 4       | 2.3233                       | 2.7653                    |
| 5       | 2.3259                       | 2.7190                    |
| 6       | 2.2830                       | 2.7631                    |
| 7       | 2.3819                       | 2.8852                    |
| 8       | 2.2979                       | 2.9691                    |
| 9       | 2.3099                       | 2.8549                    |

**Table S23.** Copper and superoxide binding energies and BSSE corrections for the nine complexes.

| Complex | Ligand EE(hartrees) | Superoxide EE(hartrees) | Ligand + Superoxide EE(hartrees) | BE (hartrees) | BSSE correction (hartrees) | BSSE Corrected BE kcal/mol |
|---------|---------------------|-------------------------|----------------------------------|---------------|----------------------------|----------------------------|
| 1       | -2401               | -150.32                 | -2551                            | -0.1457       | 0.0030                     | -91.42                     |
| 2       | -2440               | -150.32                 | -2591                            | -0.1460       | 0.0032                     | -91.62                     |
| 3       | -2553               | -150.32                 | -2704                            | -0.1228       | 0.0035                     | -77.06                     |
| 4       | -2632               | -150.32                 | -2782                            | -0.1466       | 0.0030                     | -91.98                     |
| 5       | -2632               | -150.32                 | -2782                            | -0.1465       | 0.0031                     | -91.94                     |
| 6       | -3473               | -150.32                 | -3623                            | -0.1469       | 0.0030                     | -92.18                     |
| 7       | -2707               | -150.32                 | -2857                            | -0.1452       | 0.0033                     | -91.13                     |
| 8       | -2863               | -150.32                 | -3014                            | -0.1464       | 0.0032                     | -91.86                     |
| 9       | -2824               | -150.32                 | -2974                            | -0.1469       | 0.0030                     | -92.20                     |

**Table S24.** Copper and dioxygen binding energies and BSSE corrections for the nine complexes.

| Complex | Ligand EE(hartrees) | Dioxygen EE(hartrees) | Ligand + Dioxygen EE(hartrees) | BE (hartrees) | BSSE correction (hartrees) | BSSE Corrected BE kcal/mol |
|---------|---------------------|-----------------------|--------------------------------|---------------|----------------------------|----------------------------|
| 1       | -2401               | -150.31               | -2551                          | -0.0078       | 0.0019                     | -4.93                      |
| 2       | -2440               | -150.31               | -2591                          | -0.0069       | 0.0018                     | -4.32                      |
| 3       | -2554               | -150.31               | -2704                          | -0.0080       | 0.0019                     | -5.00                      |
| 4       | -2632               | -150.31               | -2782                          | -0.0078       | 0.0019                     | -4.90                      |
| 5       | -2632               | -150.31               | -2782                          | -0.0078       | 0.0019                     | -4.89                      |
| 6       | -3473               | -150.31               | -3623                          | -0.0078       | 0.0018                     | -4.87                      |

|   |       |         |       |         |        |       |
|---|-------|---------|-------|---------|--------|-------|
| 7 | -2707 | -150.31 | -2857 | -0.0081 | 0.0020 | -5.06 |
| 8 | -2863 | -150.31 | -3013 | -0.0081 | 0.0020 | -5.07 |
| 9 | -2824 | -150.31 | -2974 | -0.0083 | 0.0019 | -5.18 |

---
